# Supplementary material
Source: Springer Nature journal article supplement (https://www.springermedizin.de/resource/supplementary/12958_2010_719_MOESM5_ESM.pdf/9568682)

Luteal development (days)

5 11 18

DERL1 (29 kDa)

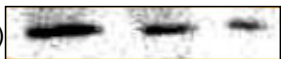

$\beta$  Actin

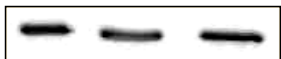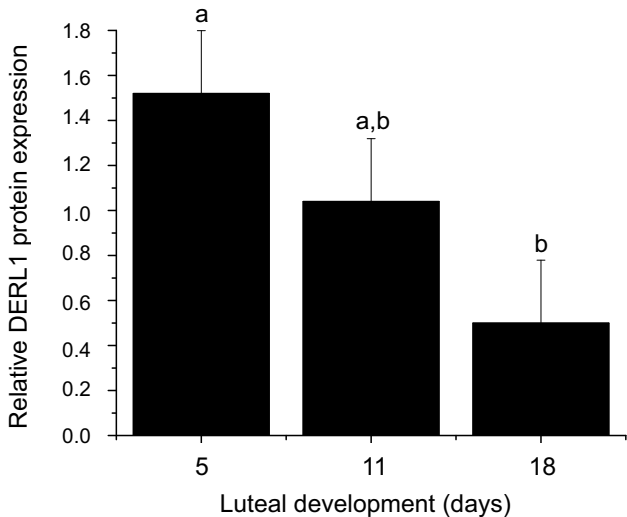

Supplement: MOESM5 [file 9568682]
